# Supplementary material for: Distinct evolution of SARS-CoV-2 Omicron XBB and BA.2.86/JN.1 lineages combining increased fitness and antibody evasion
Source: PubMed Central journal article supplement (PMC10938001; doi:10.1038/s41467-024-46490-7), 2024-03-13
Supplement: 41467_2024_46490_MOESM1_ESM.pdf [file 41467_2024_46490_MOESM1_ESM.pdf]

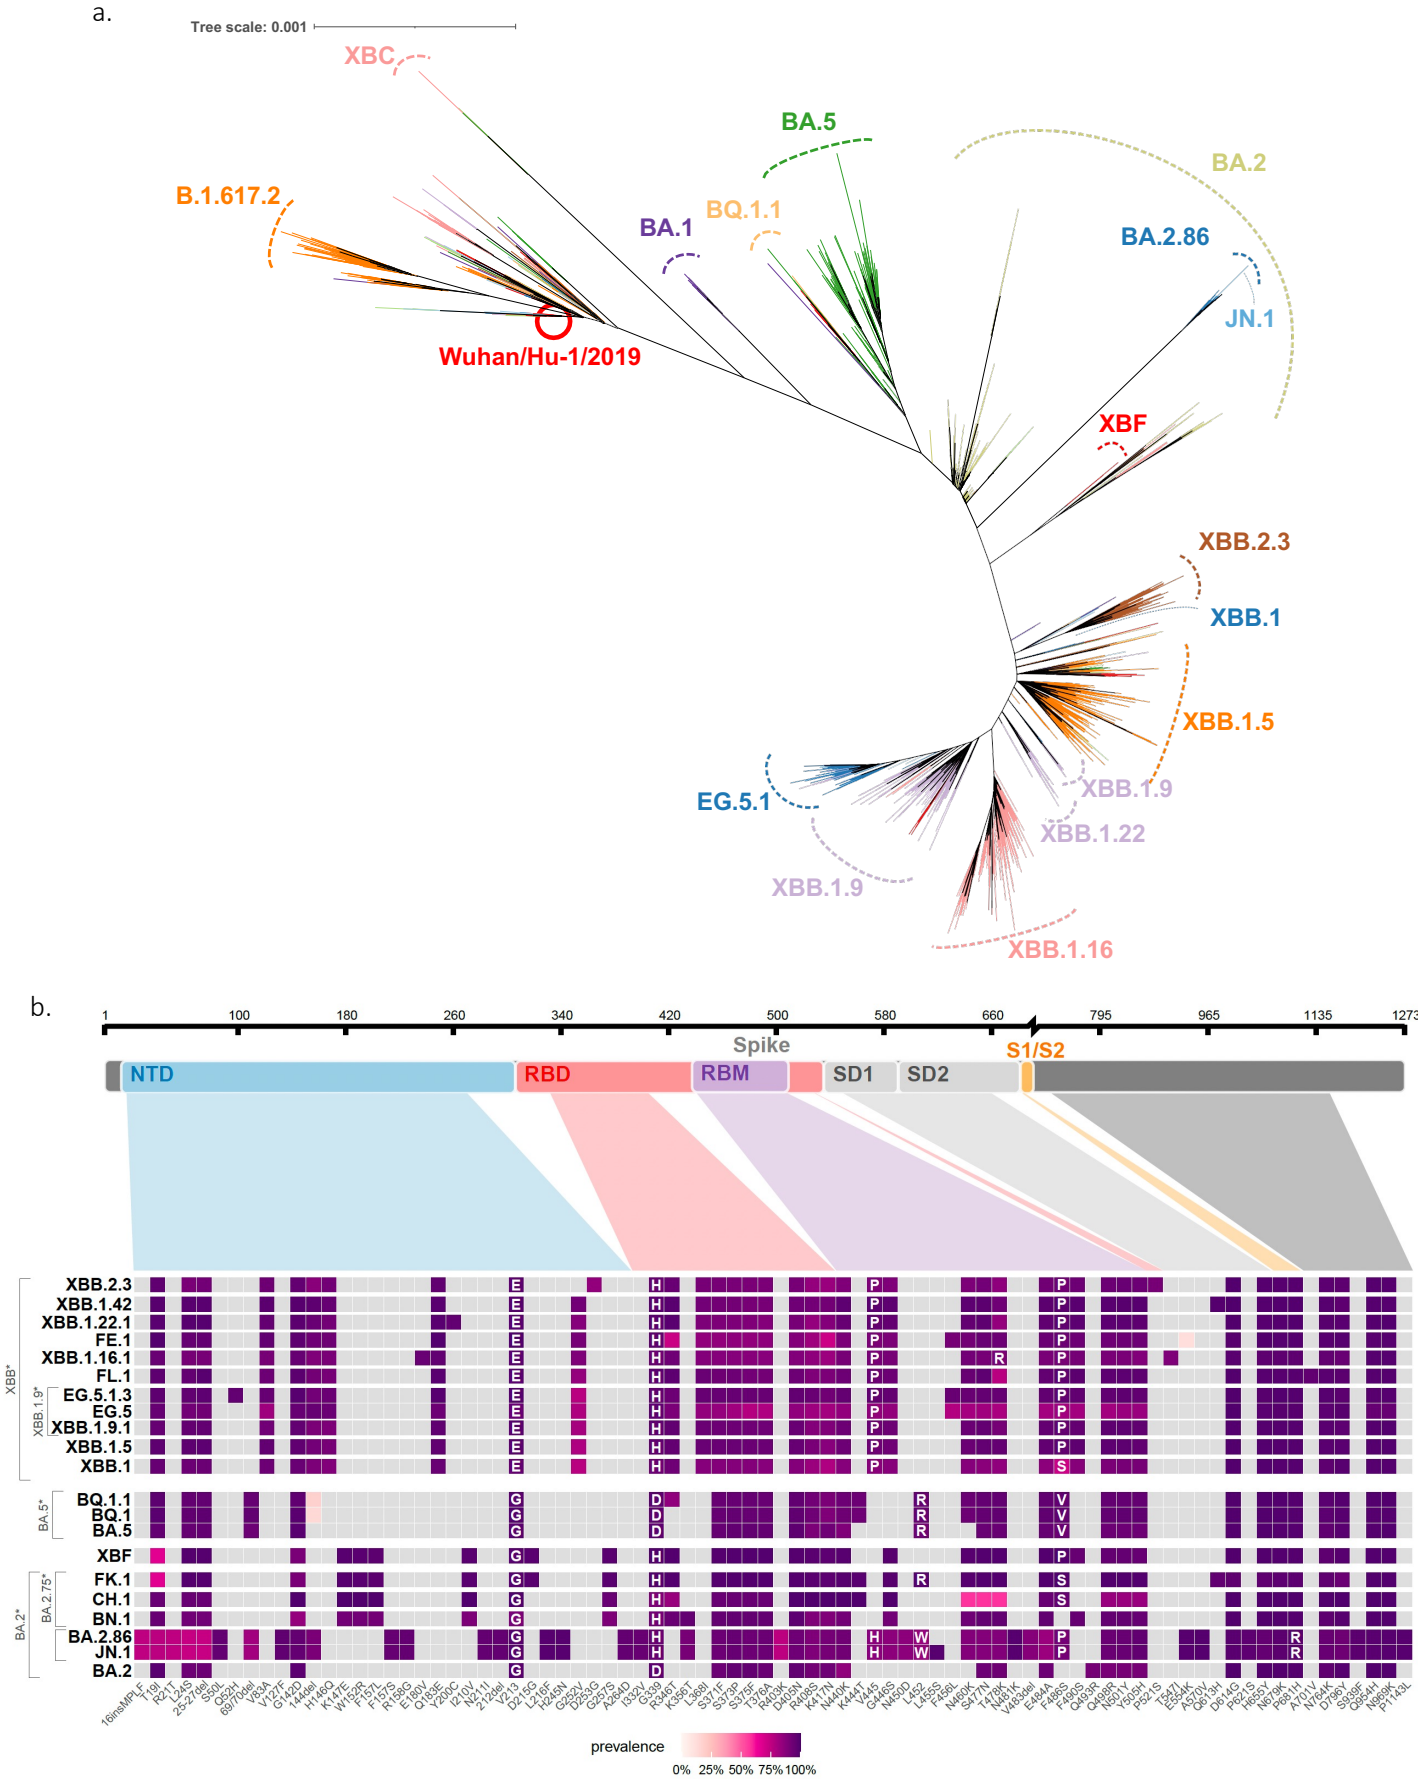

**Figure S1.** Maximum likelihood phylogeny representing the evolution of the main lineages of SARS-CoV-2 since the beginning of the epidemic. **a.** The red circle indicates one of the first sequences (Wuhan/Hu-1/2019). The BA.2.86 sequences are located inside the BA.2 clade, at the end of a long branch. Of note, a limitation of the inferred phylogeny is that known recombinant lineages (e.g. XBF or XBB) were included in the dataset, and their branching should be interpreted with caution. **b.** Comparison of spike mutations compared to the reference Wuhan\_Hu-1 for selected SARS-CoV-2 variants. The color scale reflects the frequency of the mutations within lineages based on the data available on the GISAID EpiCoV database.

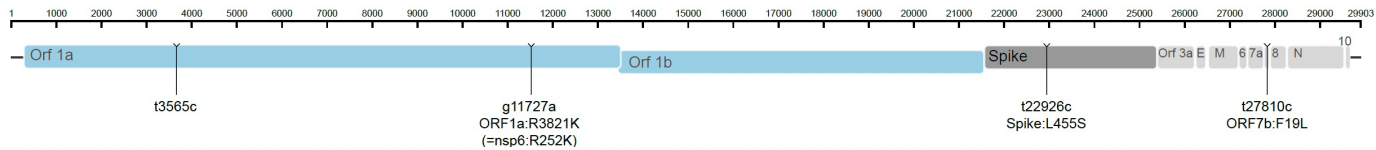

**Figure S2. Additional mutations defining lineage JN.1 in comparison to its parent lineage BA.2.86.1.** The genome is drawn to scale, and for mutation leading to an amino acid change, the protein is specified.

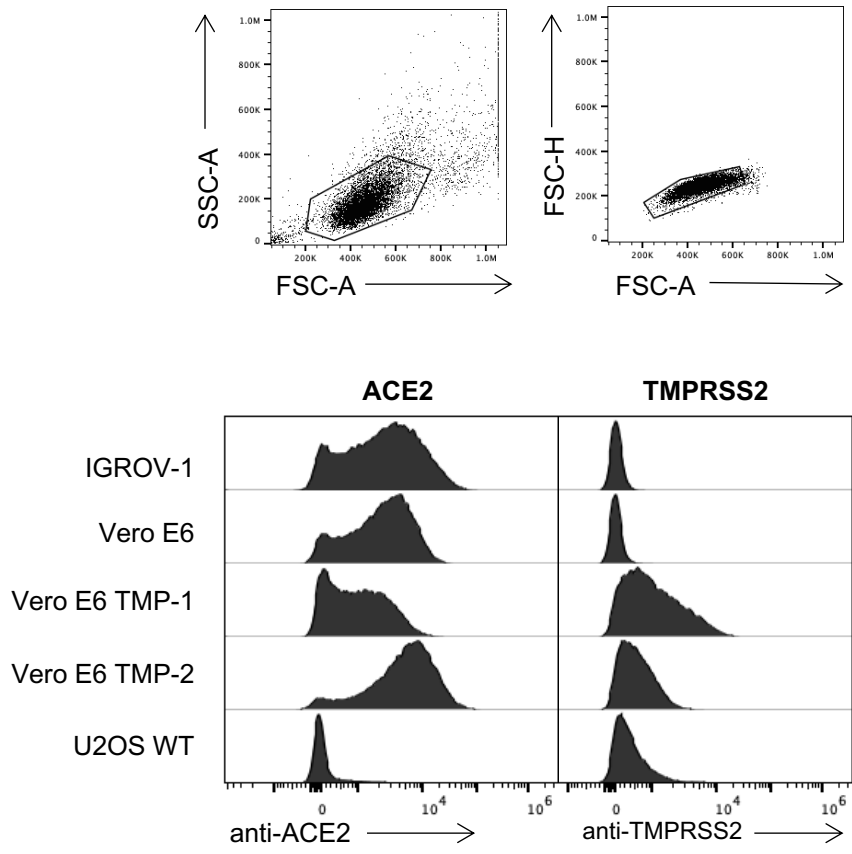

**Figure S3. ACE2 and TMPRSS2 expression in cell lines.** IGROV-1, Vero E6, Vero E6 TMP-1 and TMP-2 cells were stained with anti-ACE2 or anti-TMPRSS2 antibodies and analyzed by flow cytometry. Representative examples of the gating strategy in IGROV-1 cells and of the signals obtained in cell lines from n=3 independent experiments are shown.

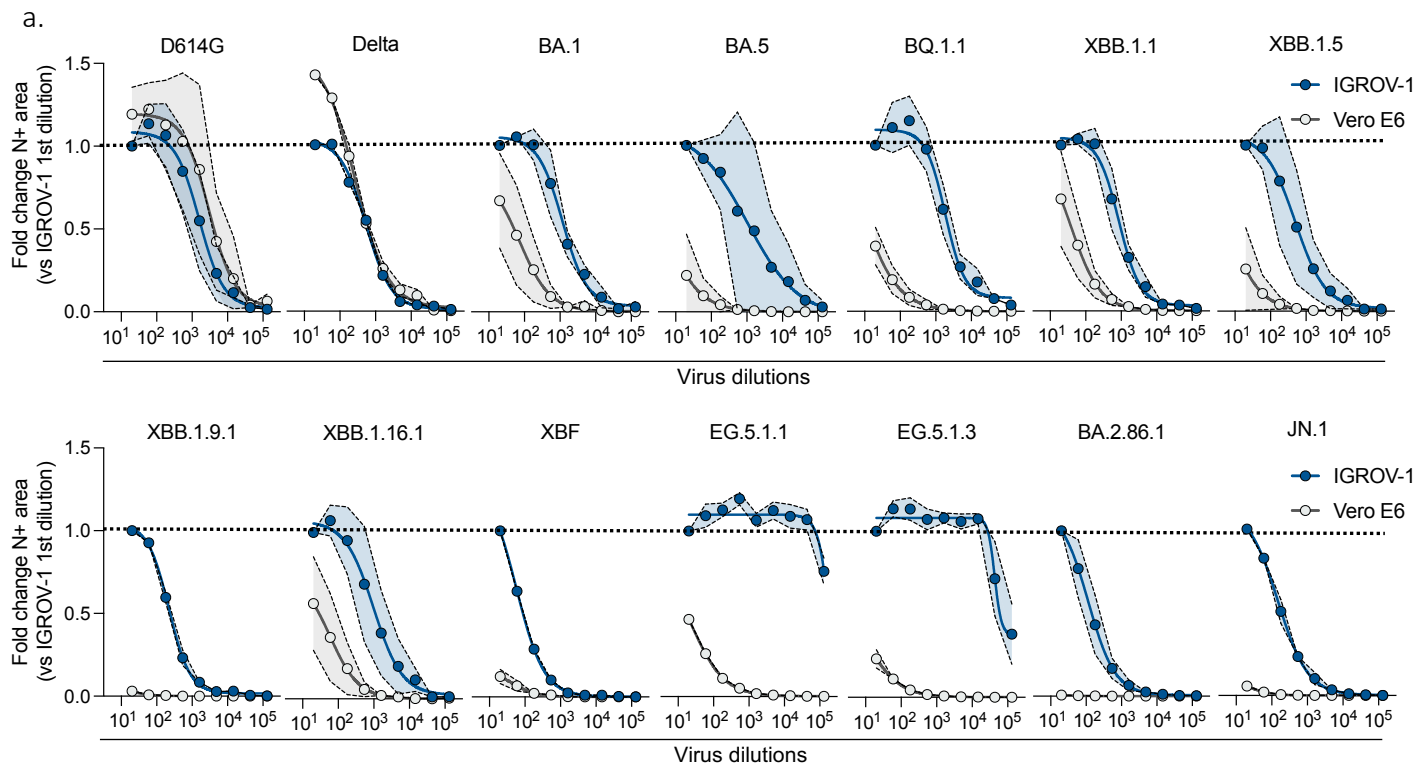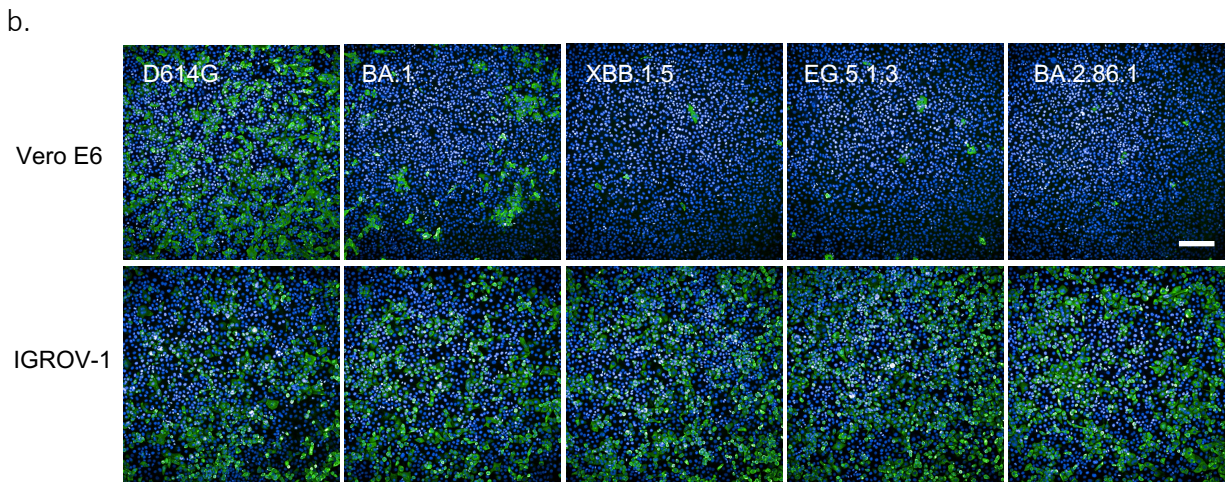

**Figure S4. Permissibility of IGROV-1 and Vero E6 cells to SARS-CoV-2 variants.** Viral titrations in IGROV-1 and Vero E6 cells. Cells were infected with serial dilutions of the indicated variants. At 24 hours post-infection (p.i.), cells were stained with a pan-coronavirus anti-N antibody (green) and Hoechst to visualize the nuclei (blue). **a.** The N positive areas in IGROV-1 (blue curves) and Vero E6 cells (grey curves) were compared for each viral dilution. The dotted line corresponds to the signal obtained with the first dilution (1/20) in IGROV-1 cells, set to the arbitrary value of 1. Data are mean  $\pm$  s.d. of 5 independent experiments ( $n=2$  for JN.1). **b.** Representative images with the indicated viral strains. An identical viral inoculum was used in the two cell lines. Scale bar, 200  $\mu$ m.

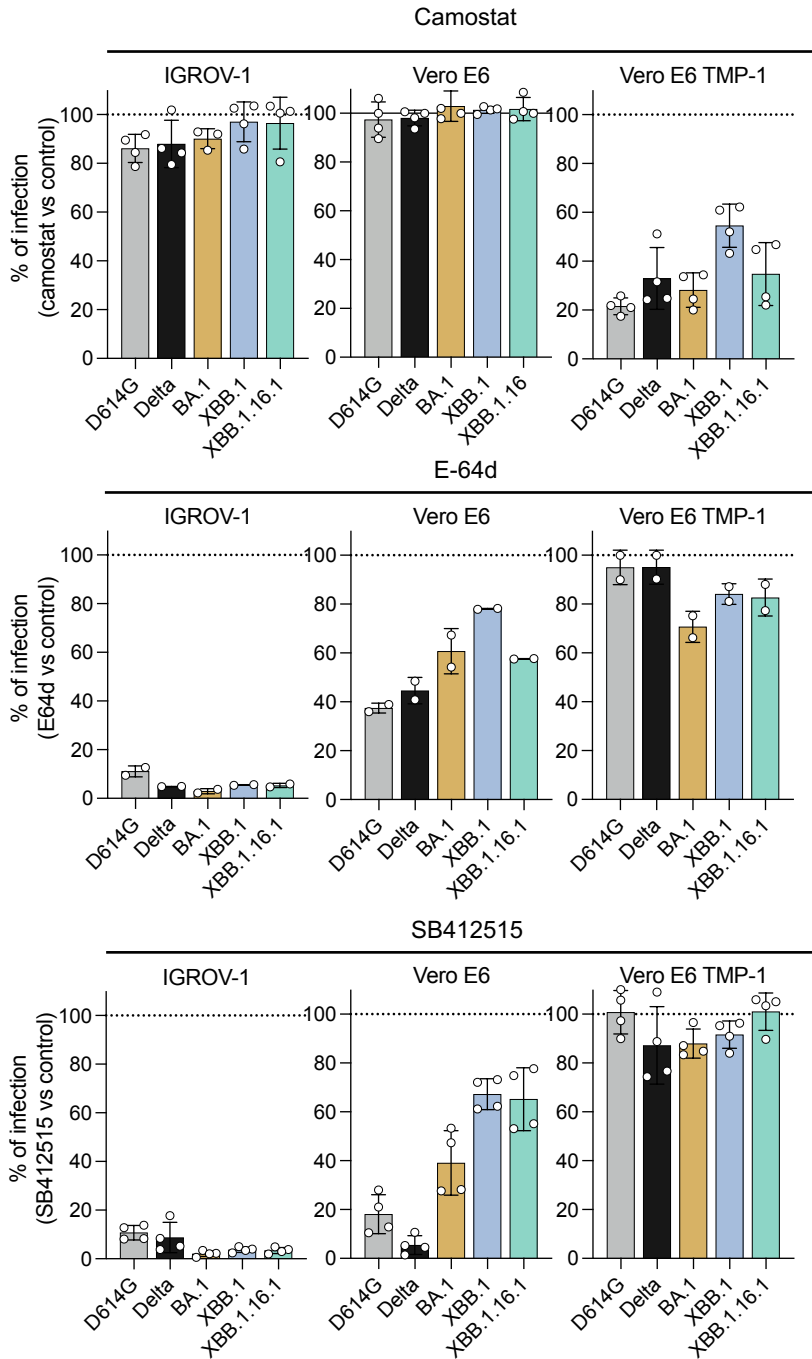

**Figure S5. Effect of the TMPRSS2 inhibitor Camostat and Cathepsin L inhibitors E-64d and SB412515 on viral infection** IGROV-1, Vero E6 and Vero E6 TMP-1 cells pre-incubated 2 h with Camostat (100  $\mu$ M), E-64d (10  $\mu$ M), or SB412515 (10  $\mu$ M) and exposed to the D614G, Delta, BA.1, XBB.1, or XBB.1.16.1 variants for 24 h. The viral inoculum was determined by titration in each cell line to achieve a similar N-positive area at 24 h pi. The cells were stained with a pan-coronavirus anti-N antibody. Hoechst was used to visualize the nuclei for evaluating drug toxicity. The percentage of infection compared to the control (without drugs, represented by the dotted line) is shown. Data are mean  $\pm$  s.d. of 4 independent experiments (2 independent experiments for E-64d).

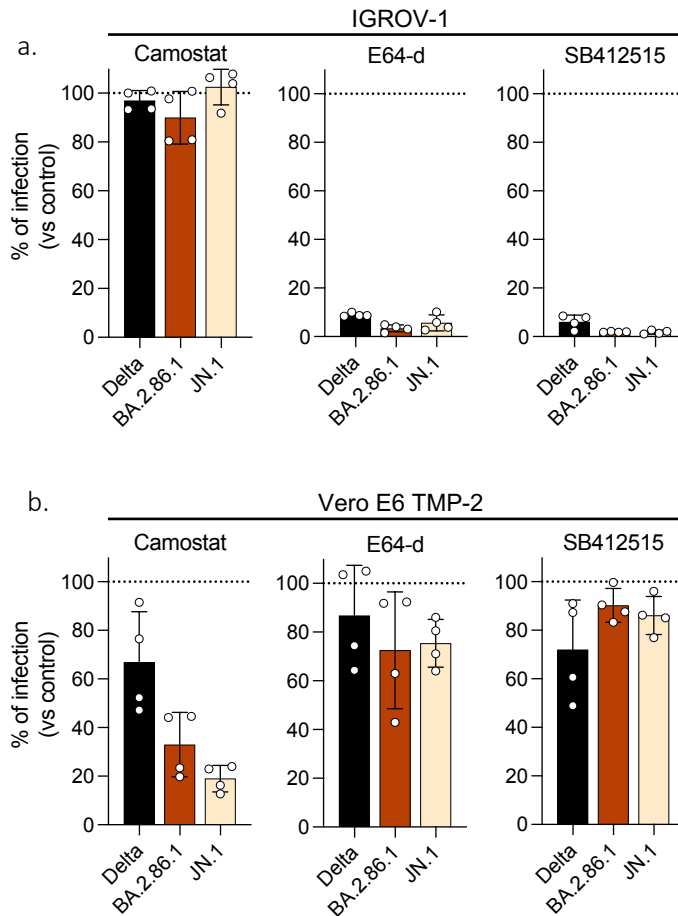

**Figure S6. Sensibility of BA.2.86.1 and JN.1 variants to TMPRSS2 inhibitor Camostat and Cathepsin L inhibitors E-64d and SB412515.** IGROV-1 (a) and Vero E6 TMP-2 (b) cells pre-incubated 2 h with Camostat (100  $\mu$ M), E-64d (10  $\mu$ M), or SB412515 (10  $\mu$ M) and exposed to the Delta, BA.2.86.1 and JN.1 variants for 24 h. The viral inoculum was determined by titration in each cell line to achieve a similar N-positive area at 24 h pi. The cells were stained with a pan-coronavirus anti-N antibody. Hoechst was used to visualize the nuclei for evaluating drug toxicity. The percentage of infection compared to the control (without drugs, represented by the dotted line) is shown. Data are mean  $\pm$  s.d. of 2 independent experiments.

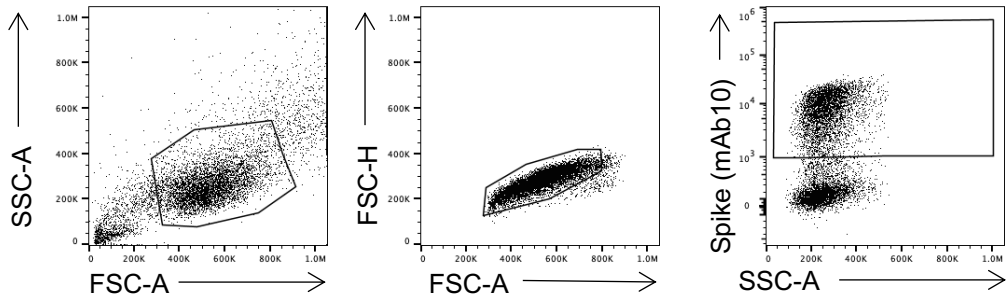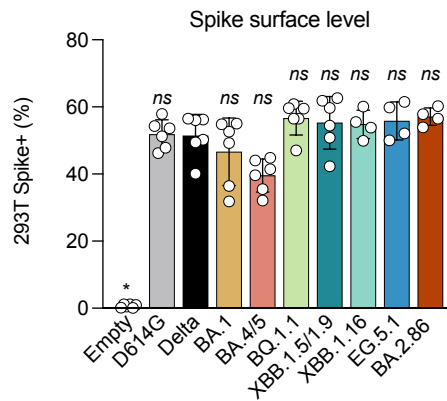

**Figure S7. Spike expression in 293T cells.** Gating strategy and levels of Spike at the cell surface. 293T cells transiently expressing the indicated variant Spikes were stained with a pan-coronavirus anti-S2 mAb 18 h post-transfection and analyzed by flow cytometry. Data are mean  $\pm$  s.d. of 6 independent experiments (n=4 for XBB.1.16.1, EG.5.1.1 and BA.2.86.1). One-way ANOVA with Kruskal-Wallis test followed by Dunn's test for multiple comparisons to compare Delta with respective variants were conducted.

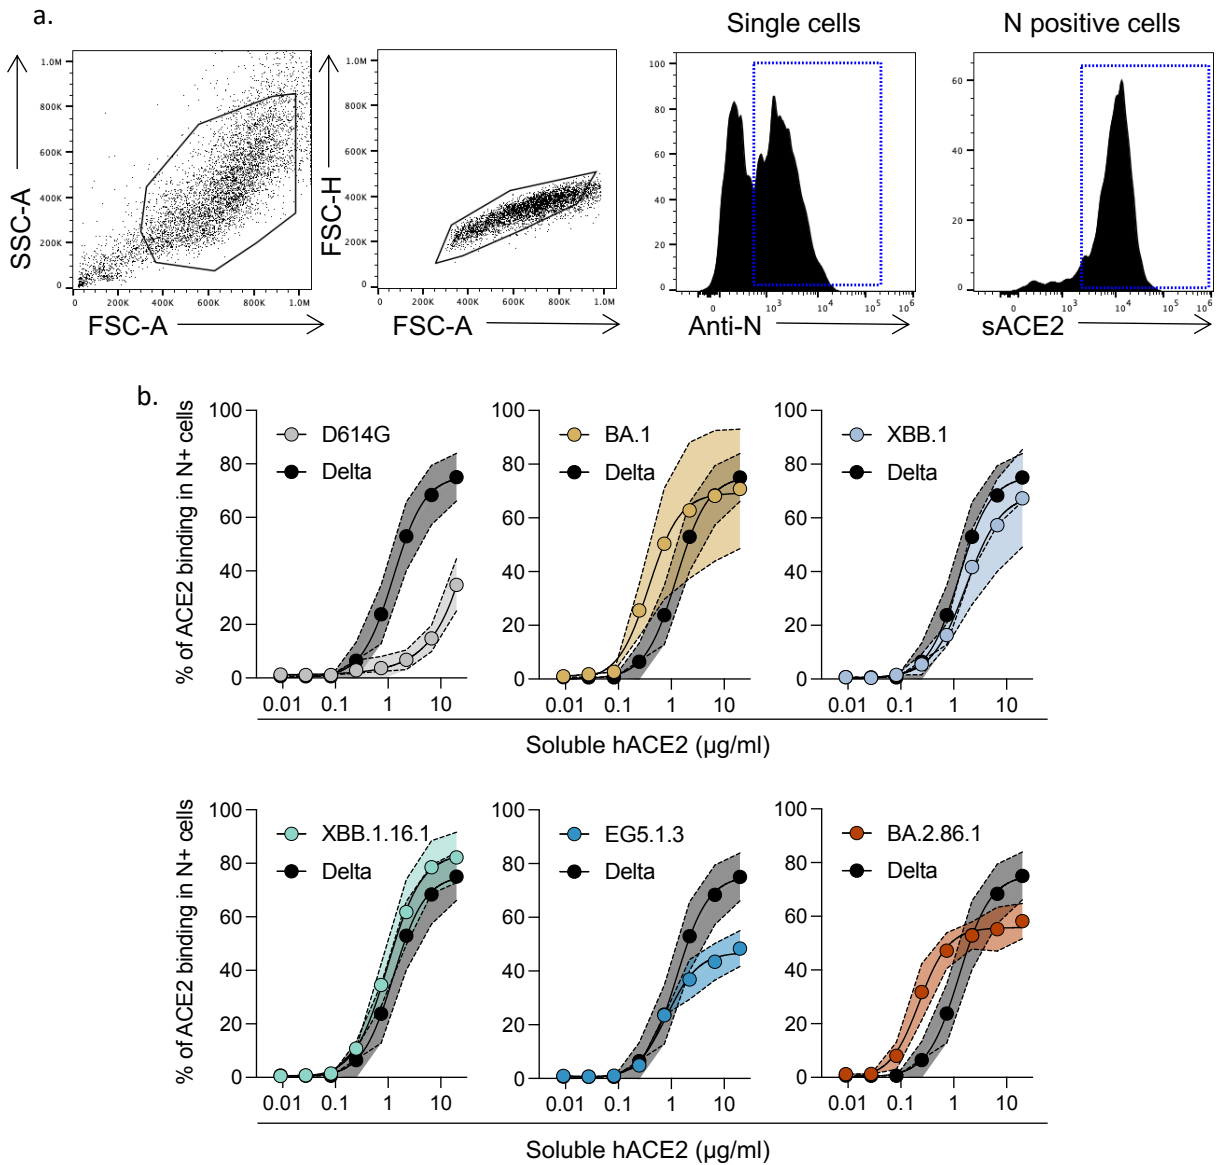

**Figure S8. Binding of variant Spike proteins to ACE2.** The affinity of the variant Spike proteins expressed at the surface of IGROV-1 infected cells was assessed by staining the cells and flow cytometry analysis. IGROV-1 cells were infected with the indicated variants. **a.** Representative examples of the gating strategy. **b.** The percentages of biotinylated hACE2+ cells are represented at various dilutions of hACE2-Fc. Data are mean  $\pm$  s.d. of 3 independent experiments.



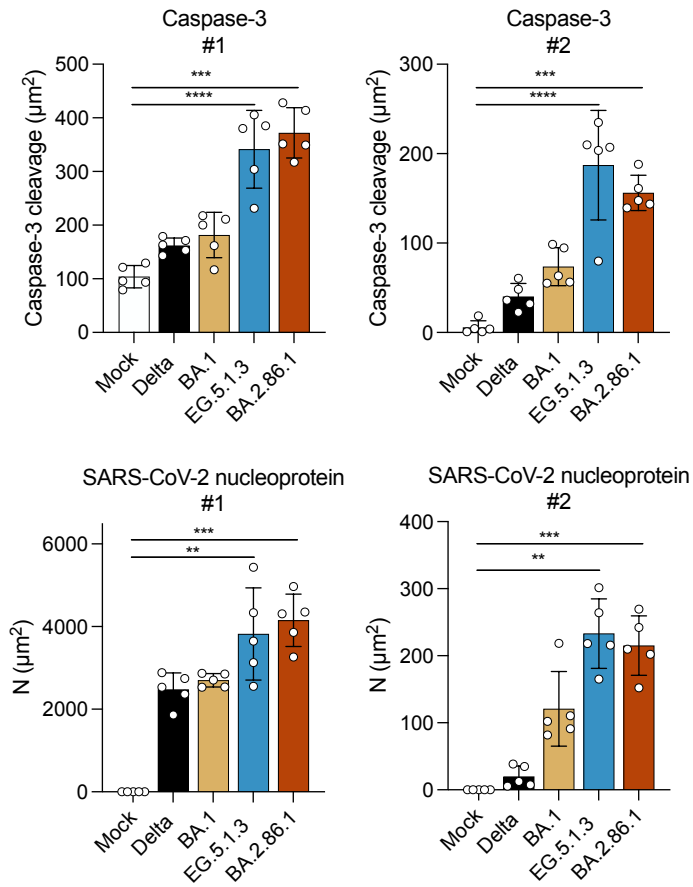

**Figure S9. Immunofluorescence of hNECs stained for cleavage products of caspase-3 and SARS-CoV-2 nucleoprotein.** Quantification of total area of cleavage products of caspase-3 and SARS-CoV-2 N. Each data point represents one randomly assigned field. One-way ANOVA with Kruskal-Wallis test followed by Dunn's test for multiple comparisons to compare Mock with respective variants were conducted

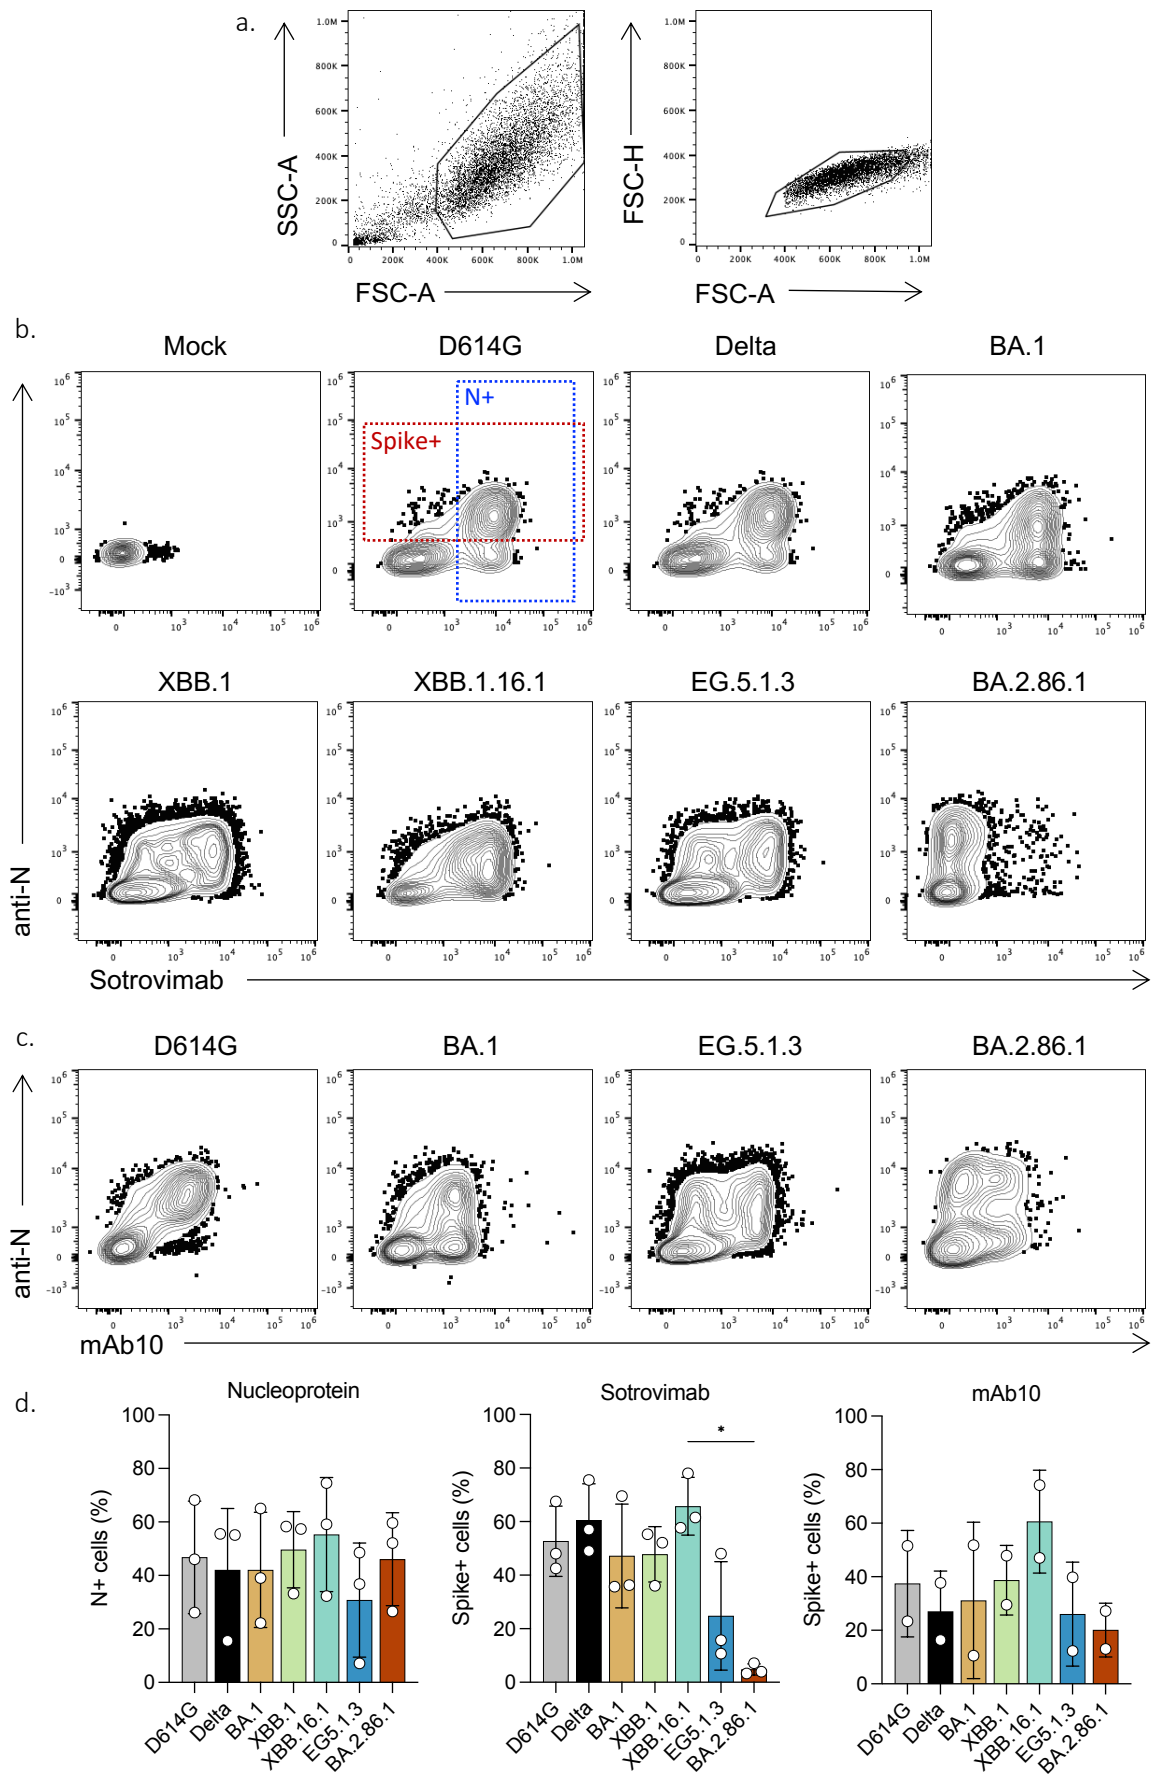

**Figure S10. Sotrovimab binding to infected cells.** IGROV-1 cells were infected with the indicated virus for 24h. Then, cells were stained with Sotrovimab or the pan-coronavirus anti-S2 mAb10 antibody. After fixation, cells were intracellularly stained with anti-SARS-CoV-2 nucleoprotein (N) antibody NCP-1 and analyzed by flow cytometry. Representative examples of the gating strategy (**a**) and co-staining of Nucleocapsid and Sotrovimab (**b**) or mAb10 (**c**). **d.** Quantification of the SARS-CoV-2 nucleoprotein+ cells (left, n=3), Spike+ cells stained with Sotrovimab (middle, n=3) and mAb10 (right, n=2). Gating strategy for N+ cells (blue gate) and S+ cells (red gate) is shown in S10b. One-way ANOVA with Kruskal-Wallis test followed by Dunn's test for multiple comparisons were conducted.

a. **Orléans Cohort: Individuals vaccinated with bivalent Original/BA.5 mRNA Pfizer**

| Patients ID | Age     | Sex | Dose 3<br>(Pfizer<br>Monovalent) | Dose 4<br>(Pfizer<br>Monovalent) | Dose 4 or 5<br>(Pfizer bivalent) | Breakthrough       | Days post-bivalent boost |    |    |     |
|-------------|---------|-----|----------------------------------|----------------------------------|----------------------------------|--------------------|--------------------------|----|----|-----|
|             |         |     |                                  |                                  |                                  |                    | before                   | 1M | 3M | 6M  |
| #1          | 50-59   | M   | Jan-22                           |                                  | Dec-22                           |                    | 0                        | 30 | /  | /   |
| #2          | 50-59   | M   | Aug-21                           | Jan-22                           | Dec-22                           |                    | 0                        | 35 | /  | /   |
| #3          | 50-59   | M   | Aug-21                           | Jan-22                           | Dec-22                           | Apr-22             | 0                        | 42 | /  | /   |
| #4          | Unknown | M   | Nov-21                           |                                  | Dec-22                           | Yes (date unknown) | 0                        | 53 | /  | /   |
| #5          | 60-69   | M   | Nov-21                           |                                  | Dec-22                           | Mar-22             | 0                        | 26 | 96 | /   |
| #6          | 50-59   | F   | Nov-21                           |                                  | Dec-22                           | Mar-22             | 0                        | 36 | 97 | /   |
| #7          | 30-39   | F   | Feb-22                           |                                  | Dec-22                           | Jan-21             | 0                        | 37 | 93 | /   |
| #8          | 60-69   | M   | Dec-21                           |                                  | Dec-22                           |                    | 0                        | 45 | 94 | /   |
| #9          | 40-49   | F   | Nov-21                           |                                  | Dec-22                           | Mar-22             | 0                        | 35 | 93 | /   |
| #10         | 40-49   | F   | Nov-22                           |                                  | Dec-22                           | Mar-22             | 0                        | 28 | 91 | /   |
| #11         | 30-39   | F   | Nov-21                           |                                  | Dec-22                           | Mar-22             | 0                        | 27 | 84 | /   |
| #12         | 40-49   | F   | NA                               |                                  | Dec-22                           | Jan-22             | 0                        | 29 | /  | /   |
| #13         | 60-69   | F   | Nov-21                           | Jun-21                           | Jan-23                           |                    | 0                        | /  | /  | /   |
| #14         | 60-69   | F   | Jun-21                           | Aug-22                           | Feb-23                           | Dec-21             | /                        | /  | /  | 128 |
| #15         | 70-79   | M   | Aug-21                           | Aug-22                           | Feb-23                           | Dec-21             | /                        | /  | /  | 128 |
| #16         | 50-59   | M   | Aug-21                           |                                  | Feb-22                           |                    | /                        | /  | /  | 484 |
| #17         | 60-69   | M   | Feb-22                           |                                  | Dec-22                           | Aug-21             | /                        | /  | /  | 195 |
| #18         | 60-69   | M   | Sep-21                           |                                  | Feb-23                           | Jan-22             | /                        | /  | /  | 154 |
| #19         | 50-59   | M   | Aug-21                           | Jan-22                           | Dec-22                           |                    | /                        | /  | /  | 202 |
| #20         | 70-79   | M   | Sep-21                           |                                  | Dec-22                           | Aug-22             | /                        | /  | /  | 216 |
| #21         | 60-69   | M   | Aug-21                           | Jan-22                           | Dec-22                           | Feb-22             | /                        | /  | /  | 202 |

b. **Lyon Cohort\_Vaccinated with bivalent Original/BA.5 Pfizer**

| Patients ID | Age   | Sex | Dose 3<br>(Pfizer<br>Monovalent) | Dose 4<br>(Pfizer<br>Monovalent) | Dose 4 or 5<br>(Pfizer bivalent) | Breakthrough | Days post-bivalent boost |    |     |
|-------------|-------|-----|----------------------------------|----------------------------------|----------------------------------|--------------|--------------------------|----|-----|
|             |       |     |                                  |                                  |                                  |              | before                   | 1M | 6M  |
| #1          | 50-59 | F   | Nov-21                           |                                  | Dec-22                           | Jun-22       | 0                        | 32 | 207 |
| #2          | 30-39 | M   | Nov-21                           | Jan-22                           | Dec-22                           | Jul-22       | 0                        | 31 | 217 |
| #3          | 60-69 | F   | Dec-21                           | Jan-22                           | Dec-22                           | /            | 0                        | 28 | 166 |
| #4          | 40-49 | F   | Dec-21                           |                                  | Dec-22                           | Feb-22       | 0                        | 32 | 218 |
| #5          | 60-69 | F   | Oct-21                           |                                  | Dec-22                           | /            | 0                        | 30 | 136 |
| #6          | 60-69 | F   | Nov-21                           |                                  | Dec-22                           | /            | 0                        | 28 | 165 |
| #7          | 30-39 | M   | Nov-21                           |                                  | Dec-22                           | Jan-22       | 0                        | 38 | 152 |
| #8          | 60-69 | F   | Nov-21                           |                                  | Dec-22                           | /            | 0                        | 32 | /   |

c. **Orléans Cohort\_Breakthrough infection in September 2023**

| Patients ID | Age | Sex | Number of Doses | Vaccine          | Days post-infection |
|-------------|-----|-----|-----------------|------------------|---------------------|
| #1          |     | M   | 3               | Pfizer           | 50                  |
| #2          |     | M   | 3               | Pfizer           | 42                  |
| #3          |     | F   | 3               | Pfizer           | 14                  |
| #4          |     | F   | 2               | Pfizer           | 39                  |
| #5          |     | F   | 2               | Pfizer           | 24                  |
| #6          |     | F   | 3               | Pfizer           | 20                  |
| #7          |     | M   | 3               | Pfizer           | 10                  |
| #8          |     | F   | 3               | Pfizer           | 25                  |
| #9          |     | F   | 3               | Astra + Pfizer   | 15                  |
| #10         |     | M   | 2               | Pfizer           | 18                  |
| #11         |     | F   | 3               | Pfizer           | 17                  |
| #12         |     | F   | 2               | Pfizer + Moderna | 14                  |

a.

| <b>Post third dose</b>                         |                      |              |
|------------------------------------------------|----------------------|--------------|
| Sex                                            | Female               | 13           |
|                                                | Male                 | 8            |
| Age (Median; range)                            |                      | 57; (31-69)  |
| Immunodeficiency                               |                      | 0            |
| Previous COVID-19 (known)                      |                      | 13           |
| 1st dose                                       | jan - april 2021     |              |
| 2nd dose                                       | jan - nov 2021       |              |
| 3rd dose                                       | aug 2021 - nov 2022  |              |
| 4th dose                                       | june 2021 - jan 2022 |              |
| Sampling days post-vaccination (median; range) |                      | 373 (25-475) |
| Cohorts                                        | Orléans (Table S1a)  | 13           |
|                                                | Lyon (Table S1b)     | 8            |

b.

| <b>1M post-bivalent (Original/BA.5) dose</b>      |                     |             |
|---------------------------------------------------|---------------------|-------------|
| Sex                                               | Female              | 12          |
|                                                   | Male                | 8           |
| Age (Median; range)                               |                     | 56; (31-69) |
| Immunodeficiency                                  |                     | 0           |
| Previous COVID-19 (known)                         |                     | 13          |
| 1st dose                                          | jan - april 2021    |             |
| 2nd dose                                          | jan - nov 2021      |             |
| 3rd dose                                          | aug 2021 -nov 2022  |             |
| 4th dose                                          | nov 2022 - jan 2023 |             |
| Sampling days post-bivalent boost (median; range) |                     | 32 (26-53)  |
| Cohorts                                           | Orléans (Table S1a) | 12          |
|                                                   | Lyon (Table S1b)    | 8           |

c.

| <b>6M post-bivalent (Original/BA.5) dose</b>      |                      |               |
|---------------------------------------------------|----------------------|---------------|
| Sex                                               | Female               | 6             |
|                                                   | Male                 | 9             |
| Age (Median; range)                               |                      | 62; (34-76)   |
| Immunodeficiency                                  |                      | 0             |
| Previous COVID-19 (known)                         |                      | 9             |
| 1st dose                                          | janv-21              |               |
| 2nd dose                                          | janv-21              |               |
| 3rd dose                                          | june 2021 - feb 2022 |               |
| 4th dose                                          | feb 2022 - feb 2023  |               |
| Sampling days post-bivalent boost (median; range) |                      | 198 (128-484) |
| Cohorts                                           | Orléans (Table S1a)  | 8             |
|                                                   | Lyon (Table S1b)     | 7             |

d.

| <b>0.5M post XBB breakthrough infection</b> |                     |            |
|---------------------------------------------|---------------------|------------|
| Sex                                         | Female              | 8          |
|                                             | Male                | 4          |
| Age (Median; range)                         |                     | Unknown    |
| Immunodeficiency                            |                     | Unknown    |
| Nb of participant with 2 doses              |                     | 4          |
| Nb of participant with 3 doses              |                     | 8          |
| Sampling days post-BT (median; range)       |                     | 19 (10-50) |
| Cohorts                                     | Orléans (Table S1c) | 12         |

| Variant    | Strain                                             | GISAID ID        | Reference    |
|------------|----------------------------------------------------|------------------|--------------|
| D614G      | hCoV-19/France/GES-1973/2020                       | EPI_ISL_414631   | Ref 68       |
| Delta      | hCoV-19/France/IDF-APHP-HEGP-20-23-2131905084/2021 | EPI_ISL_2029113  | Ref 65       |
| BA.1       | hCoV-19/Belgium/rega-20174/2021                    | EPI_ISL_6794907  | Ref 52       |
| BA.5       | hCoV-19/France/CVL-ChuTo-9800086928/2022           | EPI_ISL_13660702 | Ref 53       |
| BQ.1.1     | hCoV-19/Belgium/Rega-IPP_BA2752i/2022              | EPI_ISL_15731524 | Ref 34       |
| XBB.1.5    | hCoV-19/USA/NY-PRL-2021_0412_01L21/2021            | EPI_ISL_1635849  | Ref 48       |
| XBB.1      | hCoV-19/France/PAC-HCL022171892001/2022            | EPI_ISL_15619797 | This article |
| XBB.1.9.1  | hCoV-19/France/GES-IPP08594/2023 C2 24/04/2023     | EPI_ISL_17419152 | This article |
| XBB.1.16.1 | hCoV-19/France/GES-IPP07712/2023 C2 21/04/2023     | EPI_ISL_17383796 | This article |
| XBF        | hCoV-19/France/IDF-APHP-HEGP-81-10-2332993394/2023 | EPI_ISL_17763463 | This article |
| EG.5.1.1   | hCoV-09/France/GES-IPP15954/2023                   | EPI_ISL_17949406 | This article |
| EG.5.1.3   | hCoV-19/France/BRE-IPP15906/2023                   | EPI_ISL_17949372 | This article |
| BA.2.86.1  | hCoV-19/France/IDF-IPP17625/2023                   | EPI_ISL_18221650 | This article |
| JN.1       | hCoV-19/France/HDF-IPP21391/2023                   | EPI_ISL_18363371 | This article |

|                                          | Fold decrease versus D614G |             |               |              |                |                  |                   |            |                 |                  |             |
|------------------------------------------|----------------------------|-------------|---------------|--------------|----------------|------------------|-------------------|------------|-----------------|------------------|-------------|
|                                          | <b>BA.1</b>                | <b>BA.5</b> | <b>BQ.1.1</b> | <b>XBB.1</b> | <b>XBB.1.5</b> | <b>XBB.1.9.1</b> | <b>XBB.1.16.1</b> | <b>XBF</b> | <b>EG.5.1.3</b> | <b>BA.2.86.1</b> | <b>JN.1</b> |
| 3 doses of Pfizer                        | 5                          | 5           | 23            | 42           | 35             | 84               | 101               | 64         | 136             | 76               | 101         |
| 1M after Original/BA.5 bivalent boost    | 9                          | 6           | 50            | 107          | 62             | 150              | 144               | 71         | 141             | 125              | 254         |
| 6M after Original/BA.5 bivalent boost    | 4                          | 7           | 23            | 31           | 37             | 53               | 75                | 37         | 81              | 90               | 180         |
| 3 weeks after XBB breakthrough infection | 2                          | 1           | 6             | 8            | 4              | 8                | 9                 | 5          | 6               | 10               | 20          |
