# Supplementary material for: Distinct evolution of SARS-CoV-2 Omicron XBB and BA.2.86/JN.1 lineages combining increased fitness and antibody evasion
Source: PubMed Central journal article supplement (PMC10938001; doi:10.1038/s41467-024-46490-7), 2024-03-13
Supplement: 41467_2024_46490_MOESM3_ESM.pdf [file 41467_2024_46490_MOESM3_ESM.pdf]

## Reporting Summary

Nature Portfolio wishes to improve the reproducibility of the work that we publish. This form provides structure for consistency and transparency in reporting. For further information on Nature Portfolio policies, see our [Editorial Policies](#) and the [Editorial Policy Checklist](#).

### Statistics

For all statistical analyses, confirm that the following items are present in the figure legend, table legend, main text, or Methods section.

n/a Confirmed

- The exact sample size ( $n$ ) for each experimental group/condition, given as a discrete number and unit of measurement
- A statement on whether measurements were taken from distinct samples or whether the same sample was measured repeatedly
- The statistical test(s) used AND whether they are one- or two-sided  
*Only common tests should be described solely by name; describe more complex techniques in the Methods section.*
- A description of all covariates tested
- A description of any assumptions or corrections, such as tests of normality and adjustment for multiple comparisons
- A full description of the statistical parameters including central tendency (e.g. means) or other basic estimates (e.g. regression coefficient) AND variation (e.g. standard deviation) or associated estimates of uncertainty (e.g. confidence intervals)
- For null hypothesis testing, the test statistic (e.g.  $F$ ,  $t$ ,  $r$ ) with confidence intervals, effect sizes, degrees of freedom and  $P$  value noted  
*Give  $P$  values as exact values whenever suitable.*
- For Bayesian analysis, information on the choice of priors and Markov chain Monte Carlo settings
- For hierarchical and complex designs, identification of the appropriate level for tests and full reporting of outcomes
- Estimates of effect sizes (e.g. Cohen's  $d$ , Pearson's  $r$ ), indicating how they were calculated

*Our web collection on [statistics for biologists](#) contains articles on many of the points above.*

### Software and code

Policy information about [availability of computer code](#)

Data collection

Harmony Software v4.9 (Perkin-Elmer), Attune Nxt Software v3.2.1 (ThermoFischer), Flowjo Software v10.7.1, GISAID Epicov database (<https://gisaid.org/>)

Data analysis

Excel 365 v16.46 (Microsoft), Prism v9.0.2 (Graph Pad Software), Trimmomatic v0.39, mega hit v1.2.9, CLC Assembly Cell v5.1.0, Geneious prime v2023.2.1, DIAMOND v2.0.4, pangolin v4.3.1, nextalign v2.14.0, gfast v1.2.1, goalign v0.3.5, iqtree v2.2.0, gotree v0.4.4, R v4.3, ggplot2 v3.4.3. The bioinformatic workflow used is available on Github [https://github.com/SimonLorieriLab/sarscov2\\_Oct2023](https://github.com/SimonLorieriLab/sarscov2_Oct2023), and has been deposited on Zenodo (<https://zenodo.org/doi/10.5281/zenodo.10692772>).

For manuscripts utilizing custom algorithms or software that are central to the research but not yet described in published literature, software must be made available to editors and reviewers. We strongly encourage code deposition in a community repository (e.g. GitHub). See the Nature Portfolio [guidelines for submitting code & software](#) for further information.

### Data

Policy information about [availability of data](#)

All manuscripts must include a [data availability statement](#). This statement should provide the following information, where applicable:

- Accession codes, unique identifiers, or web links for publicly available datasets
- A description of any restrictions on data availability
- For clinical datasets or third party data, please ensure that the statement adheres to our [policy](#)

All data supporting the findings of this study are available within the article or from the corresponding authors upon reasonable request without any restrictions.

The sequences of the viral stocks of the viruses isolated in this study have been deposited on GenBank (Accession numbers: PP405601-PP405606).

## Research involving human participants, their data, or biological material

Policy information about studies with [human participants or human data](#). See also policy information about [sex, gender \(identity/presentation\), and sexual orientation](#) and [race, ethnicity and racism](#).

|                                                                    |                                                                                                                                                                                                                                                                                                                                                                                                                                                                                                                                                                                                                                                                                                                                                                                                                                                                                                                                                      |
|--------------------------------------------------------------------|------------------------------------------------------------------------------------------------------------------------------------------------------------------------------------------------------------------------------------------------------------------------------------------------------------------------------------------------------------------------------------------------------------------------------------------------------------------------------------------------------------------------------------------------------------------------------------------------------------------------------------------------------------------------------------------------------------------------------------------------------------------------------------------------------------------------------------------------------------------------------------------------------------------------------------------------------|
| Reporting on sex and gender                                        | Gender was collected based on self-reporting. Sex or gender analysis was not performed due to the limited number of participants.                                                                                                                                                                                                                                                                                                                                                                                                                                                                                                                                                                                                                                                                                                                                                                                                                    |
| Reporting on race, ethnicity, or other socially relevant groupings | Given the exploratory design of the study, race, ethnicity and socially grouping were not pre-established and not reported.                                                                                                                                                                                                                                                                                                                                                                                                                                                                                                                                                                                                                                                                                                                                                                                                                          |
| Population characteristics                                         | Given the exploratory design of the study, the characteristics of participants were not pre-established when entering the cohorts. Relevant covariates (age, sex, disease, vaccinations and previous COVID-19) are provided in the corresponding supplementary tables. Nasopharyngeal swabs used for viral isolation were leftover samples from usual care their use for research purposes was authorized by the ethics committee "Comite d'ethique de la recherche AP-HP Centre" affiliated to the AP-HP (Assistance publique des Hopitaux de Paris; IRB registration# 00011928) or provided by the the National Reference Centre for Respiratory Viruses hosted by Institut Pasteur. All Participants or their legal authorized representatives provided a written informed consent.                                                                                                                                                               |
| Recruitment                                                        | Individuals were recruited during their visit at the hospitals.<br>Individuals were included without any selection other than those imposed by the entry criteria. Under these conditions, no particular bias is envisaged.                                                                                                                                                                                                                                                                                                                                                                                                                                                                                                                                                                                                                                                                                                                          |
| Ethics oversight                                                   | The "Orleans" cohort is an ongoing prospective, monocentric, longitudinal, observational cohort clinical study aiming to describe the kinetic of neutralizing antibodies after SARS-CoV-2 infection or vaccination (ClinicalTrials.gov Identifier: NCT05315583). This study was approved by lie-de-France IV ethical committee.<br>The "Lyon" cohort is an ongoing prospective, multicentric, longitudinal, interventional cohort clinical study (COVID-SER) conducted at Hospices Civils de Lyon. The objective is to evaluate the effectiveness of commercially developed serological test kits currently in development, which will be used for the diagnosis of patients with suspected SARS-CoV-2 infection. A sub-study aimed to build a collection of biological samples and transfer of residual blood products to external partners for the advancement of scientific knowledge on SARS-CoV-2 (ClinicalTrials.gov identifier: NCT04341142). |

Note that full information on the approval of the study protocol must also be provided in the manuscript.

## Field-specific reporting

Please select the one below that is the best fit for your research. If you are not sure, read the appropriate sections before making your selection.

Life sciences       Behavioural & social sciences       Ecological, evolutionary & environmental sciences

For a reference copy of the document with all sections, see [nature.com/documents/nr-reporting-summary-flat.pdf](https://nature.com/documents/nr-reporting-summary-flat.pdf)

## Life sciences study design

All studies must disclose on these points even when the disclosure is negative.

|                 |                                                                                                                                                                                                                                                                                             |
|-----------------|---------------------------------------------------------------------------------------------------------------------------------------------------------------------------------------------------------------------------------------------------------------------------------------------|
| Sample size     | Given the explanatory nature of the study aiming at describing a phenomenon whose frequency has not yet been established it was not possible to use statistical methods were used to predetermine sample size. We included maximum of participants per group to allow statistical analysis. |
| Data exclusions | None                                                                                                                                                                                                                                                                                        |
| Replication     | All experiments were performed and verified in multiple replicates as indicated in figure legends.                                                                                                                                                                                          |
| Randomization   | The experiments were not randomized as we tested all available samples. Individuals were included without selection other than those imposed by the entry criteria.                                                                                                                         |
| Blinding        | For convenience experiments were not blinded. However, the clinical sampling and biological measurements were performed by different teams. Only the final assembly of the data revealed the global view of the results.                                                                    |

## Reporting for specific materials, systems and methods

We require information from authors about some types of materials, experimental systems and methods used in many studies. Here, indicate whether each material, system or method listed is relevant to your study. If you are not sure if a list item applies to your research, read the appropriate section before selecting a response.

## Materials &amp; experimental systems

## Methods

| n/a                                 | Involvement                                               |
|-------------------------------------|-----------------------------------------------------------|
| <input type="checkbox"/>            | <input checked="" type="checkbox"/> Antibodies            |
| <input type="checkbox"/>            | <input checked="" type="checkbox"/> Eukaryotic cell lines |
| <input checked="" type="checkbox"/> | <input type="checkbox"/> Palaeontology and archaeology    |
| <input checked="" type="checkbox"/> | <input type="checkbox"/> Animals and other organisms      |
| <input type="checkbox"/>            | <input checked="" type="checkbox"/> Clinical data         |
| <input checked="" type="checkbox"/> | <input type="checkbox"/> Dual use research of concern     |
| <input checked="" type="checkbox"/> | <input type="checkbox"/> Plants                           |

| n/a                                 | Involvement                                        |
|-------------------------------------|----------------------------------------------------|
| <input checked="" type="checkbox"/> | <input type="checkbox"/> ChIP-seq                  |
| <input type="checkbox"/>            | <input checked="" type="checkbox"/> Flow cytometry |
| <input checked="" type="checkbox"/> | <input type="checkbox"/> MRI-based neuroimaging    |

## Antibodies

## Antibodies used

NCP-1 is produced by and Nathalie Morel (CEA). Casirivimab (REGN10933; Regeneron), Imdevimab (REGN10987; Regeneron), Cilgavimab (AZD1061; AstraZeneca), Tixagevimab (AZD8895; AstraZeneca) and Sotrovimab (VIR-7831; GSK) were kind gifts of Thierry Prazuck and Laurent Hocqueloux.

- nucleoprotein (N) antibody NCP-1 (0.1 µg/mL) (ref 35)
- anti-IgG Alexa Fluor 488 (dilution 1:500, Invitrogen; cat# A11029)
- Streptavidin Alexa Fluor 647 (dilution 1:500, Invitrogen; cat# S32357)
- anti-alpha tubulin (dilution 1:100, 66031-1-Ig; Proteintech),
- rabbit anti-cleaved caspase-3 (dilution 1:100, D175; Cell Signaling Technology)
- Phalloidin-Atto 565/633 (dilution 1:500, 75784-1MG-F; Sigma)
- anti-TMPRSS2 VHH-A01-Fc 58 (1 µg/ml) (ref. 57)
- anti-ACE2 VHH-B07-Fc (0.5 µg/ml) (kind gift of A. Brelot)

## Validation

The reactivity of NCP-1 to SARS-CoV-2 Nucleocapsid was validated using ELISA binding assays (ref 35). The reactivity of Casirivimab, Imdevimab, Cilgavimab, Tixagevimab and Sotrovimab to the SARS-CoV-2 spike was validated by measuring their neutralizing activity against SARS-CoV-2 in O. Schwartz laboratory. Validation of goat anti-human IgGs has been performed by their providers (Jackson ImmunoResearch and Invitrogen).

## Eukaryotic cell lines

Policy information about [cell lines and Sex and Gender in Research](#)

## Cell line source(s)

IGROV-1 cells were from the NCI-60 cell line panel and have been authenticated (ref 67). Vero E6 and Vero-TMPRSS2 were described previously. 293T (CRL-3216) and U2OS (Cat# HTB-96) cells were obtained from ATCC. U2OS-GFP1-10 and 11 (S-Fuse cells) were derived from U2OS. Vero E6 TMP-2 cells were kindly provided by Dr Makoto Takeda lab.

## Authentication

IGROV-1, 293T, U2OS and Vero-derived cells have been authenticated by genotyping (Eurofins).

## Mycoplasma contamination

All cells are negative for mycoplasma contamination. Tests are performed every Monday.

Commonly misidentified lines  
(See [ICLAC](#) register)

None

## Clinical data

Policy information about [clinical studies](#)

All manuscripts should comply with the ICMJE [guidelines for publication of clinical research](#) and a completed [CONSORT checklist](#) must be included with all submissions.

## Clinical trial registration

NCT04750720 and NCT04341142

## Study protocol

Protocols can be accessed on [clinicaltrials.gov](#)

## Data collection

The Orléans cohort started on August 2020 in Orléans Hospital (Centre hospitalier Réginal Orléans), and is on-going. The Lyon cohort started on April 2020 at Hospices Civils de Lyon and is on-going.

## Outcomes

The primary outcome of the study were the presence of neutralizing antibodies (S-Fuse assay).

## Plants

|                       |                                                                                                                                                                                                                                                                                                                                                                                                                                                                                                                                                   |
|-----------------------|---------------------------------------------------------------------------------------------------------------------------------------------------------------------------------------------------------------------------------------------------------------------------------------------------------------------------------------------------------------------------------------------------------------------------------------------------------------------------------------------------------------------------------------------------|
| Seed stocks           | Report on the source of all seed stocks or other plant material used. If applicable, state the seed stock centre and catalogue number. If plant specimens were collected from the field, describe the collection location, date and sampling procedures.                                                                                                                                                                                                                                                                                          |
| Novel plant genotypes | Describe the methods by which all novel plant genotypes were produced. This includes those generated by transgenic approaches, gene editing, chemical/radiation-based mutagenesis and hybridization. For transgenic lines, describe the transformation method, the number of independent lines analyzed and the generation upon which experiments were performed. For gene-edited lines, describe the editor used, the endogenous sequence targeted for editing, the targeting guide RNA sequence (if applicable) and how the editor was applied. |
| Authentication        | Describe any authentication procedures for each seed stock used or novel genotype generated. Describe any experiments used to assess the effect of a mutation and, where applicable, how potential secondary effects (e.g. second site T-DNA insertions, mosaicism, off-target gene editing) were examined.                                                                                                                                                                                                                                       |

## Flow Cytometry

### Plots

Confirm that:

- The axis labels state the marker and fluorochrome used (e.g. CD4-FITC).
- The axis scales are clearly visible. Include numbers along axes only for bottom left plot of group (a 'group' is an analysis of identical markers).
- All plots are contour plots with outliers or pseudocolor plots.
- A numerical value for number of cells or percentage (with statistics) is provided.

### Methodology

|                           |                                                                                              |
|---------------------------|----------------------------------------------------------------------------------------------|
| Sample preparation        | Cells were stained as indicated in the method section. All samples were acquired within 24h. |
| Instrument                | Attune NxT Acoustic Focusing Cytometer, blue/red/violet/yellow (catalog number : 15360667)   |
| Software                  | AttuneNxT Software v3.2.1                                                                    |
| Cell population abundance | At least 10,000 cells were acquired for each condition.                                      |
| Gating strategy           | All gates were set on unstained cells.                                                       |

- Tick this box to confirm that a figure exemplifying the gating strategy is provided in the Supplementary Information.
